# Supplementary material for: MoO2/Mo2N hybrid nanobelts doped with gold nanoparticles and their enhanced supercapacitive behavior
Source: Royal Society of Chemistry journal article supplement (doi:10.1039/c8nj02404a), 2018-01-01
Supplement: c8nj02404a1.pdf [file c8nj02404a1.pdf]

## Supporting Information

### **MoO<sub>2</sub>/Mo<sub>2</sub>N Hybrid Nanobelts Doped with Gold Nanoparticles and its Enhanced Supercapacitive Behavior**

Yongtao Tan <sup>a,b,1</sup>, Wenju Dong <sup>b,1</sup>, Yuan Li <sup>b</sup>, Muchakayala Ravi <sup>a,b</sup>, Lingbin Kong <sup>a,b</sup>,  
Long Kang <sup>a,b</sup>, Fen Ran <sup>a,b,\*</sup>

<sup>a</sup> *State Key Laboratory of Advanced Processing and Recycling of Non-ferrous Metals, Lanzhou University of Technology, Lanzhou 730050, P. R. China*

<sup>b</sup> *School of Material Science and Engineering, Lanzhou University of Technology, Lanzhou 730050, Gansu, P. R. China*

\*Corresponding author: Fen Ran (ranfen@163.com; or ranfen@lut.cn)

<sup>1</sup>These authors contributed equally to this work.

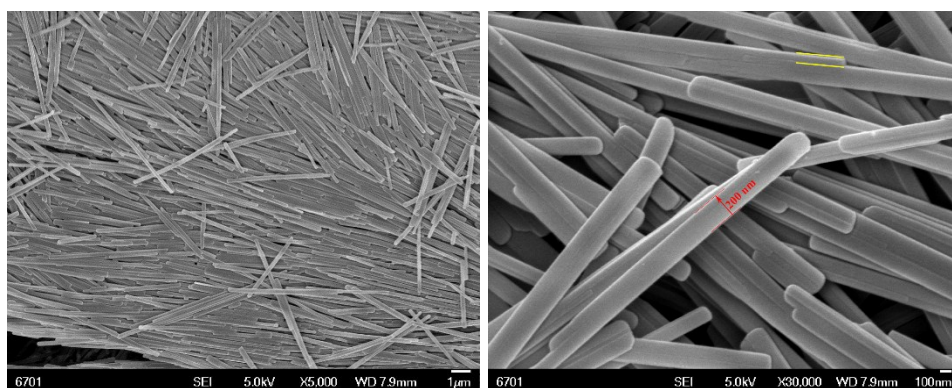

**Figure S1** SEM image of MoO<sub>3</sub> precursor (×5, 000 and ×30, 000)

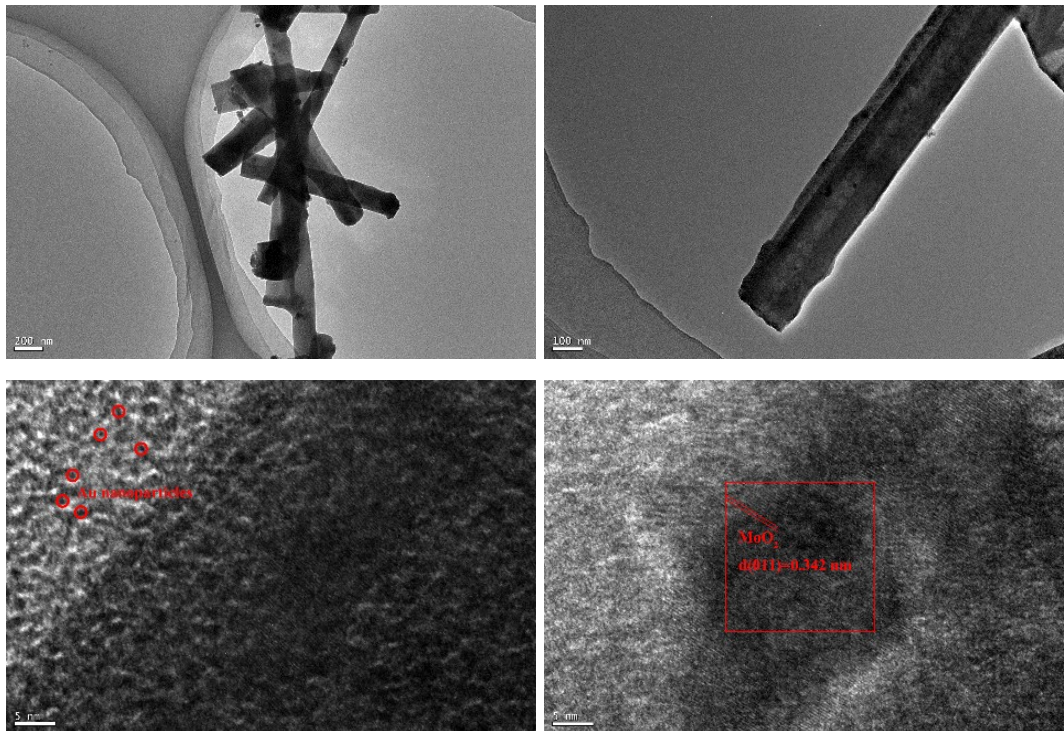

**Figure S2** TEM and HRTEM of AuNPMoON

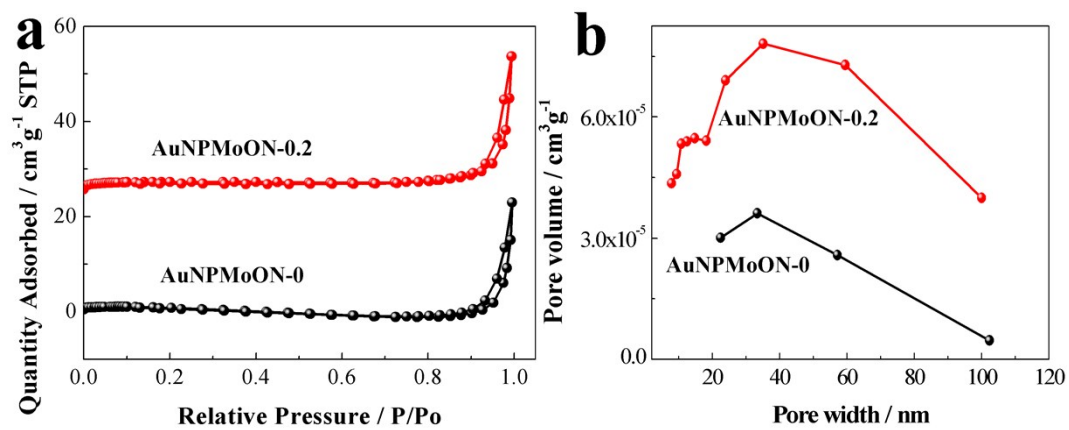

**Figure S3**  $\text{N}_2$  adsorption-desorption curves and pore-size distributions of AuNPMoON-0 and AuNPMoON-0.2

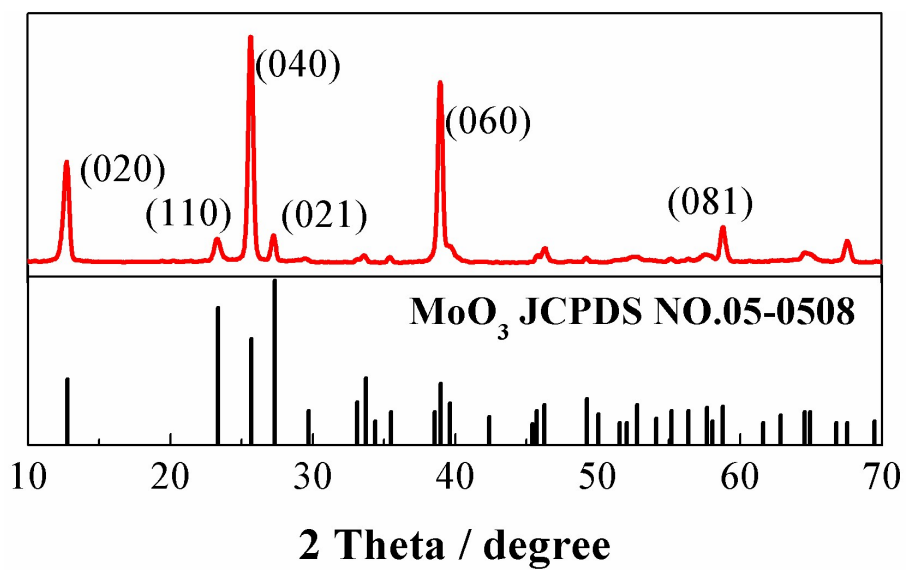

Figure S4 XRD pattern of MoO<sub>3</sub>

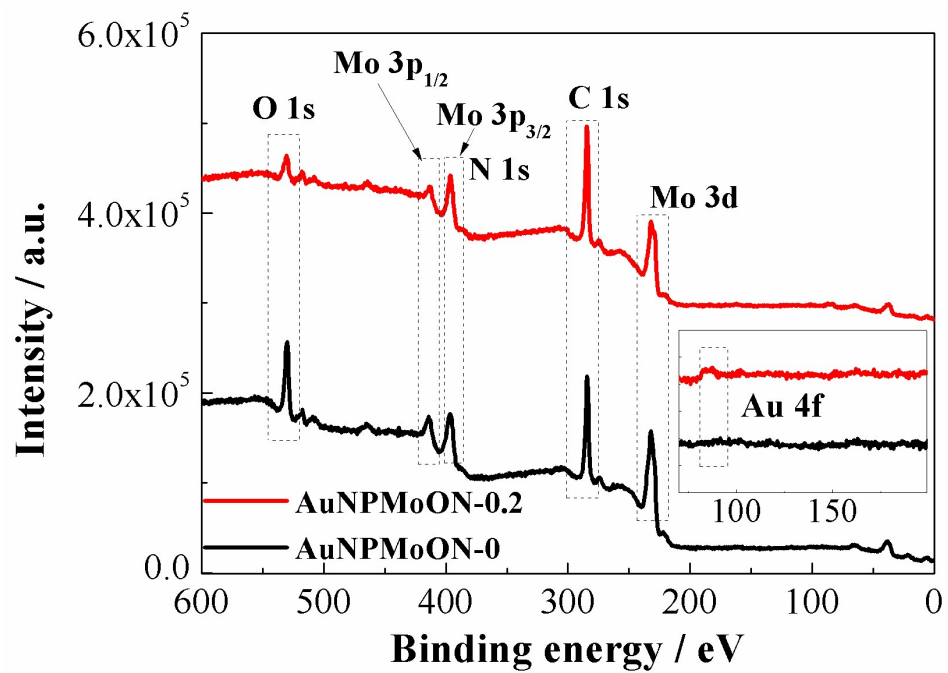

**Figure S5** XPS spectra of AuNPMoON-0 and AuNPMoON-0.2

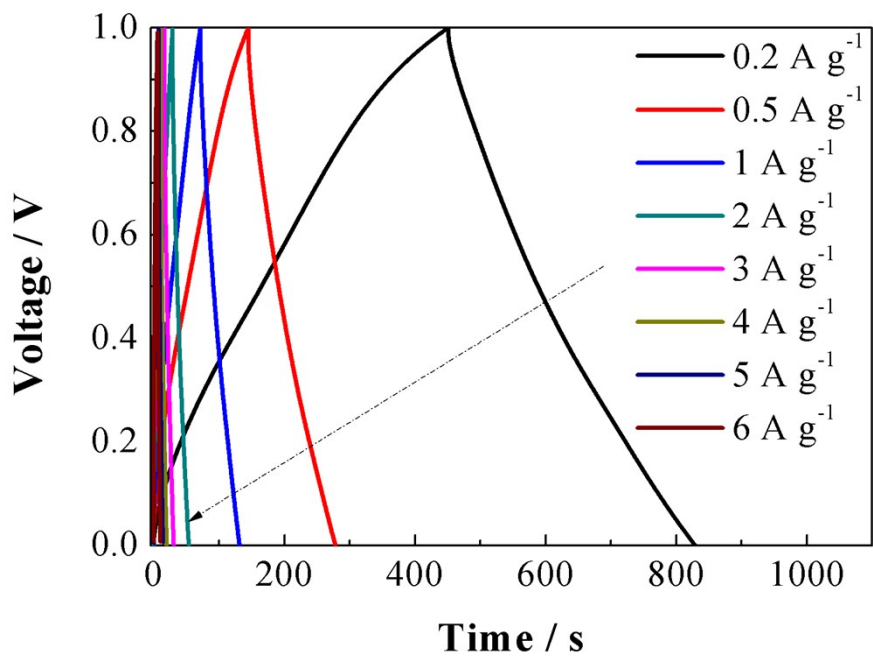

**Figure S6** GCD curves of PANI||AuNPMoON device

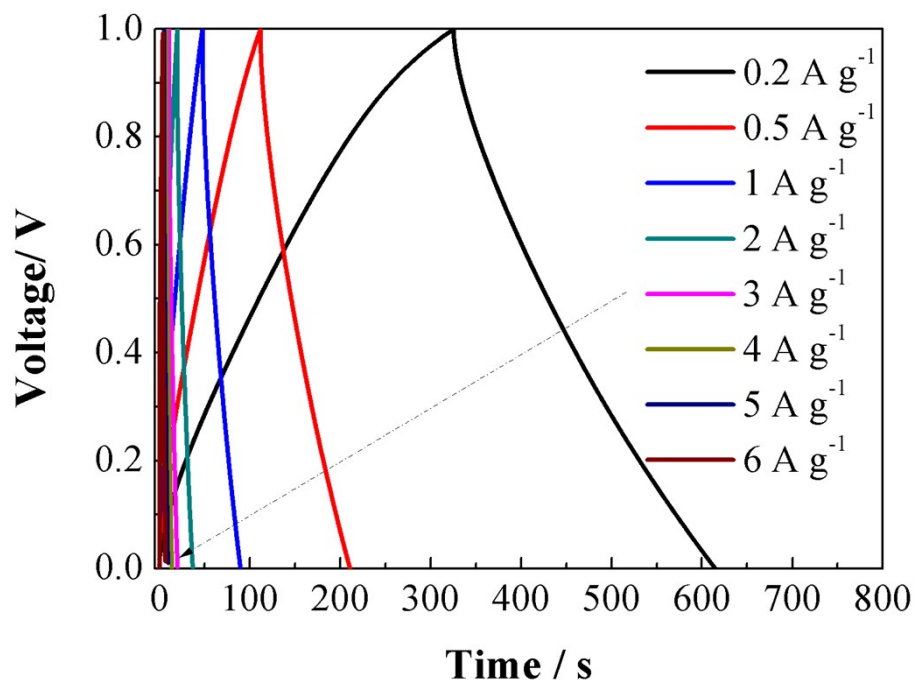

**Figure S7** GCD curves of AC||AuNPMoON device



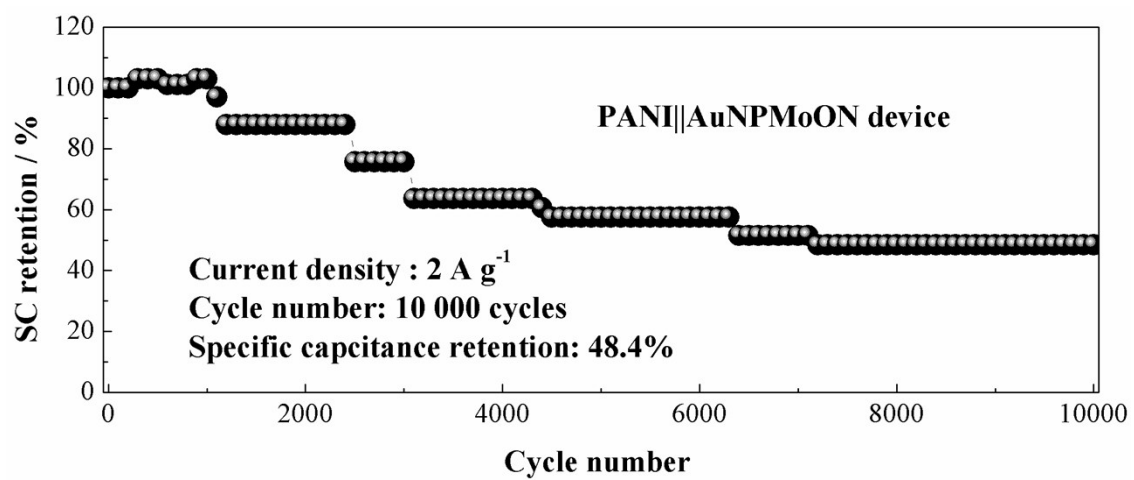

**Figure S8** Cycle life of PANI||AuMoON device at current density of 2 A g<sup>-1</sup>
